# Supplementary material for: Hydrolytic Degradation and Mechanical Stability of Poly(ε-Caprolactone)/Reduced Graphene Oxide Membranes as Scaffolds for In Vitro Neural Tissue Regeneration
Source: Membranes (Basel). 2018 Mar 5;8(1):12. doi: 10.3390/membranes8010012 (PMC5872194; doi:10.3390/membranes8010012)
Supplement: Supplementary file 1 [file membranes-08-00012-s001.pdf]

Article

# Supplementary Material: Hydrolytic Degradation and Mechanical Stability of Poly( $\epsilon$ -caprolactone)/Reduced Graphene Oxide Membranes as Scaffolds for In Vitro Neural Tissue Regeneration

Sandra Sanchez-González <sup>1</sup>, Nazely Diban <sup>1,\*</sup> and Ane Urriaga <sup>1</sup>

<sup>1</sup> Department of Chemical and Biomolecular Engineering, University of Cantabria, Avda. Los Castros s/n, 39005 Santander, Spain; [sandra.sanchez@unican.es](mailto:sandra.sanchez@unican.es); [dibann@unican.es](mailto:dibann@unican.es); [urriaga@unican.es](mailto:urriaga@unican.es)

\* Correspondence: [dibann@unican.es](mailto:dibann@unican.es); Tel.: +34-942-206778

Videos S1 and S2 show the mechanical properties of the membranes after 12 months of degradation for PCL and PCL/rGO, respectively.

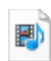

PCL resistance  
(t=12m).mp4

**Video S1.** Mechanical behaviour of PCL membranes after 12 months of hydrolytic degradation.



PCLrGO resistance  
(t=12m).mp4

**Video S2.** Mechanical behaviour of PCL/rGO membranes after 12 months of hydrolytic degradation.

Equation S1 shows 2<sup>nd</sup> order reaction kinetics of hydrolysis of polyesters, which is proportional to the concentration of water and the concentration of carboxylic bonds that are susceptible of hydrolysis,

$$\frac{dE}{dt} = k \cdot C_B \cdot C_w \cdot t \quad (\text{S1})$$

where  $E = \rho / (N \cdot M_0)$  is the chain end concentration,  $C_B = (\rho / M_0) \cdot (1 - 1/N)$  is the total bond concentration,  $C_w$  is the water concentration and  $k$  is the kinetic constant of the hydrolysis of the PCL polymer. Moreover,  $\rho$  is the density of the polymer samples,  $N$  is the degree of polymerization and  $M_0$  is the initial monomer molecular weight.

For polyesters with large molecular weight ( $N \gg 1$ ), carboxylic/ester polymer groups present similar probability of hydrolytic attack, and therefore the hydrolysis kinetics can be simplified to be expressed as shown below:

$$1/M_n = (1/M_{n_0}) + (1/M_0) \cdot k \cdot C_w \cdot t \quad (\text{S2})$$

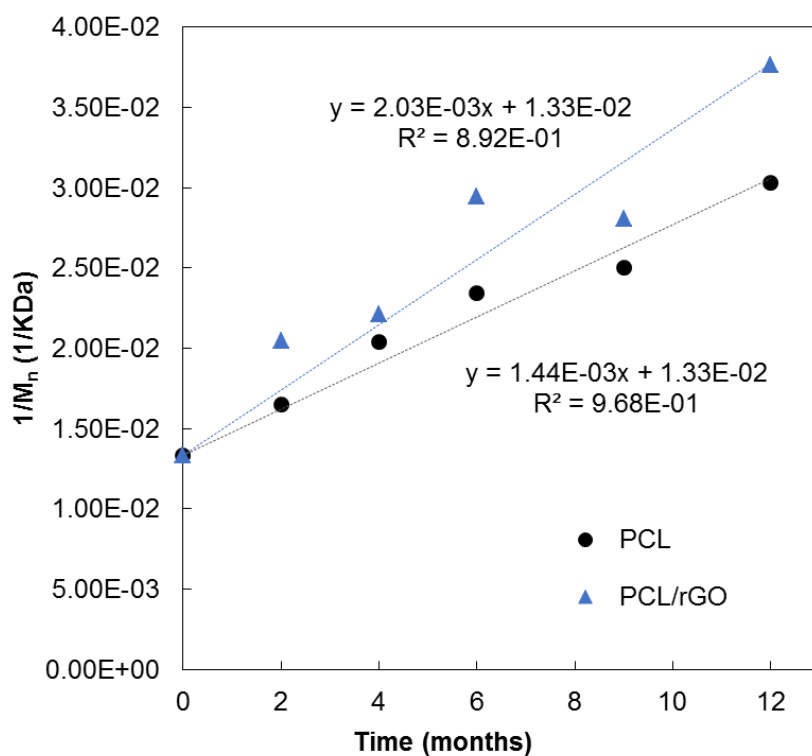

**Figure S1.** Kinetics of the hydrolysis of PCL and PCL/rGO membranes. Fitting of the molecular weight to the 2nd order hydrolysis kinetics (Equation S2) is depicted (dotted lines). For the present system  $M_0$  and  $C_w$  are the same for the PCL plain membranes and the PCL/rGO material as well as  $Mn_0$ . Therefore from Figure S1, it can be extracted that  $k(PCL)/k(PCL/rGO) = (2.03 \times 10^{-3})/(1.44 \times 10^{-3}) \approx 1.4$ .

The PBS UV-vis spectra of the initial and final PBS medium containing the PCL and PCL/rGO membranes during the degradation experiments were recorded in order to determine the fate of rGO nanoplatelets during the hydrolytic degradation of the membranes. Moreover, several 5 mg samples of PCL/rGO membranes (at 0 and 12 months of degradation) were dissolved in 10 mL of THF and centrifuged. Afterwards the undissolved rGO was qualitatively observed and compared.

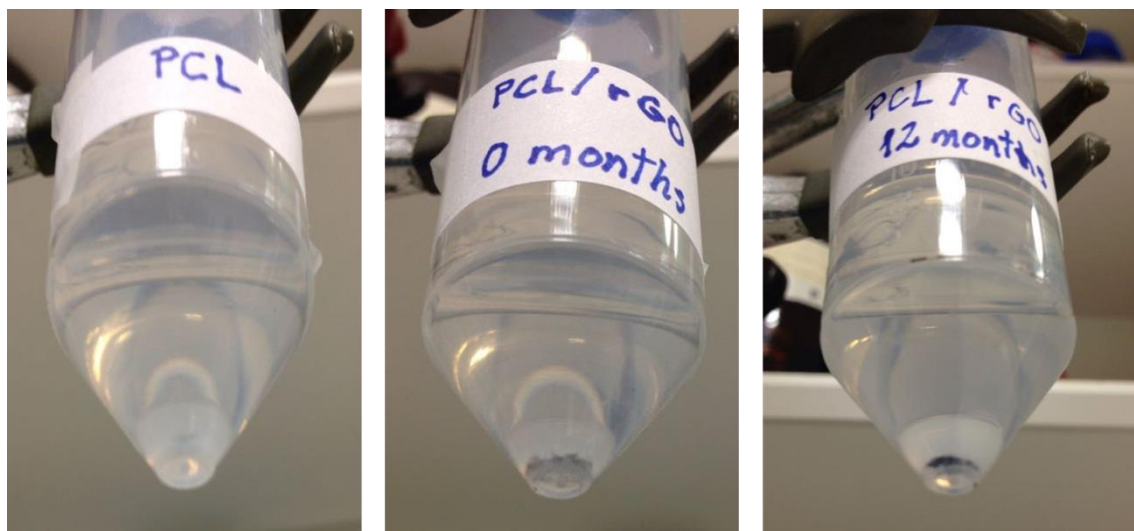

**Figure S2.** Photographs showing the rGO content at 0 and 12 months of degradation of the PCL/rGO membranes. (PCL is shown as control).

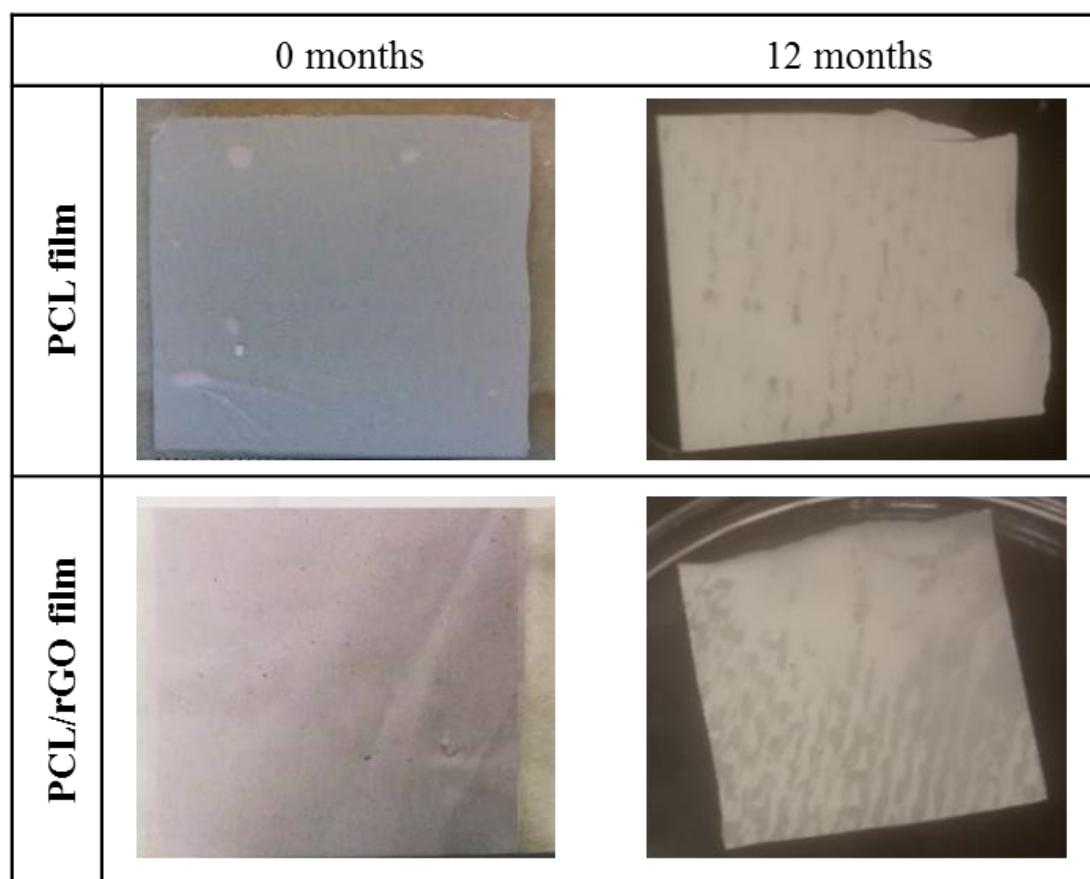

**Figure S3.** Photographs showing the visual aspect of the wet PCL and PCL/rGO membranes at 0 and 12 months of degradation (membrane pieces sizing 4×4 cm<sup>2</sup>).

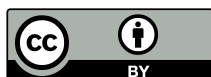

© 2018 by the authors. Submitted for possible open access publication under the terms and conditions of the Creative Commons Attribution (CC BY) license (<http://creativecommons.org/licenses/by/4.0/>).
